# Supplementary material for: Orbital CO 2 reconstruction using boron isotopes during the late Pleistocene, an assessment of accuracy
Source: Copernicus journal article supplement (doi:10.5194/cp-2022-93), 2023-01-05
Supplement: Supplementary file 1 [file cp-2022-93-supplement.pdf]

Supplementary information for “Orbital CO<sub>2</sub> reconstruction using boron isotopes during the late Pleistocene, an assessment of accuracy.” By de la Vega et al.

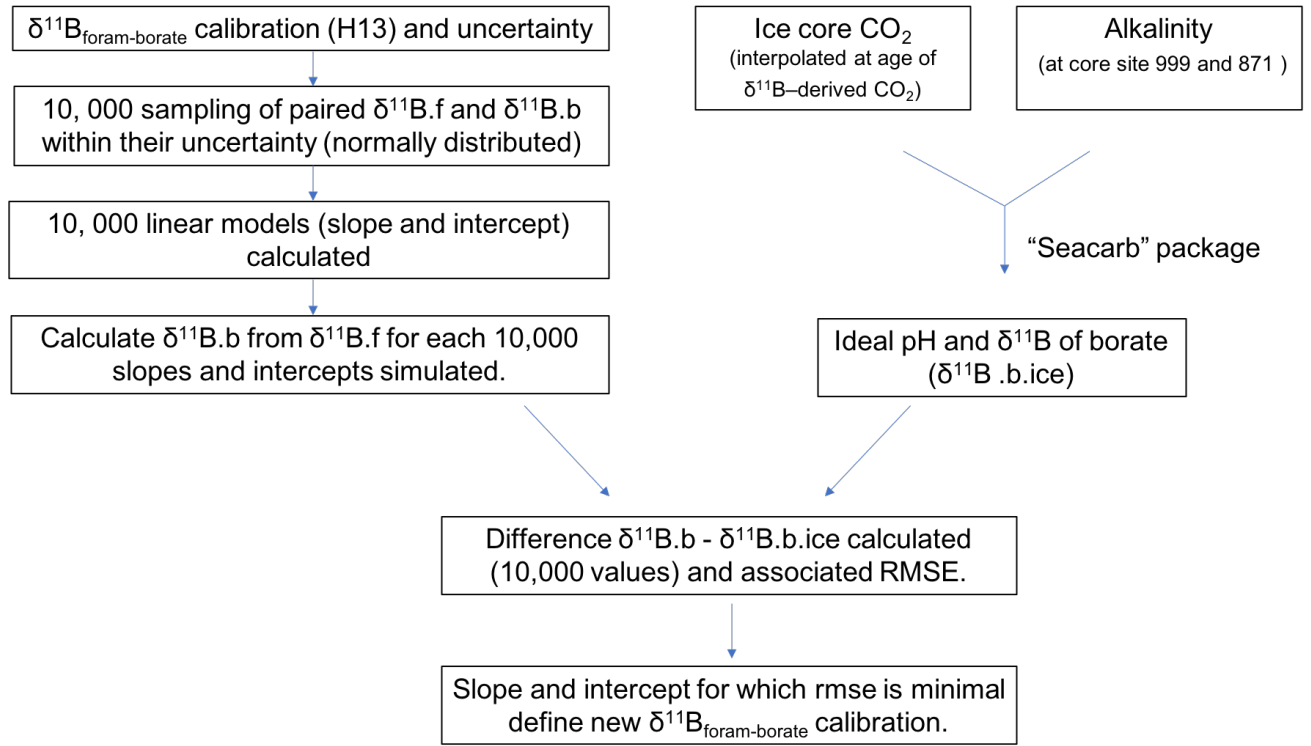

Figure S1. Optimisation of the borate-foram  $\delta^{11}\text{B}$  calibration by minimising the RMSE between the  $\delta^{11}\text{B}$  of borate derived from ice core  $\text{CO}_2$ , and the  $\delta^{11}\text{B}$  of borate simulated from 10,000 slopes and intercept. The slopes and intercept are simulated within the uncertainty of  $\delta^{11}\text{B}$  borate and pH calibration of Henchan et al. (2013).

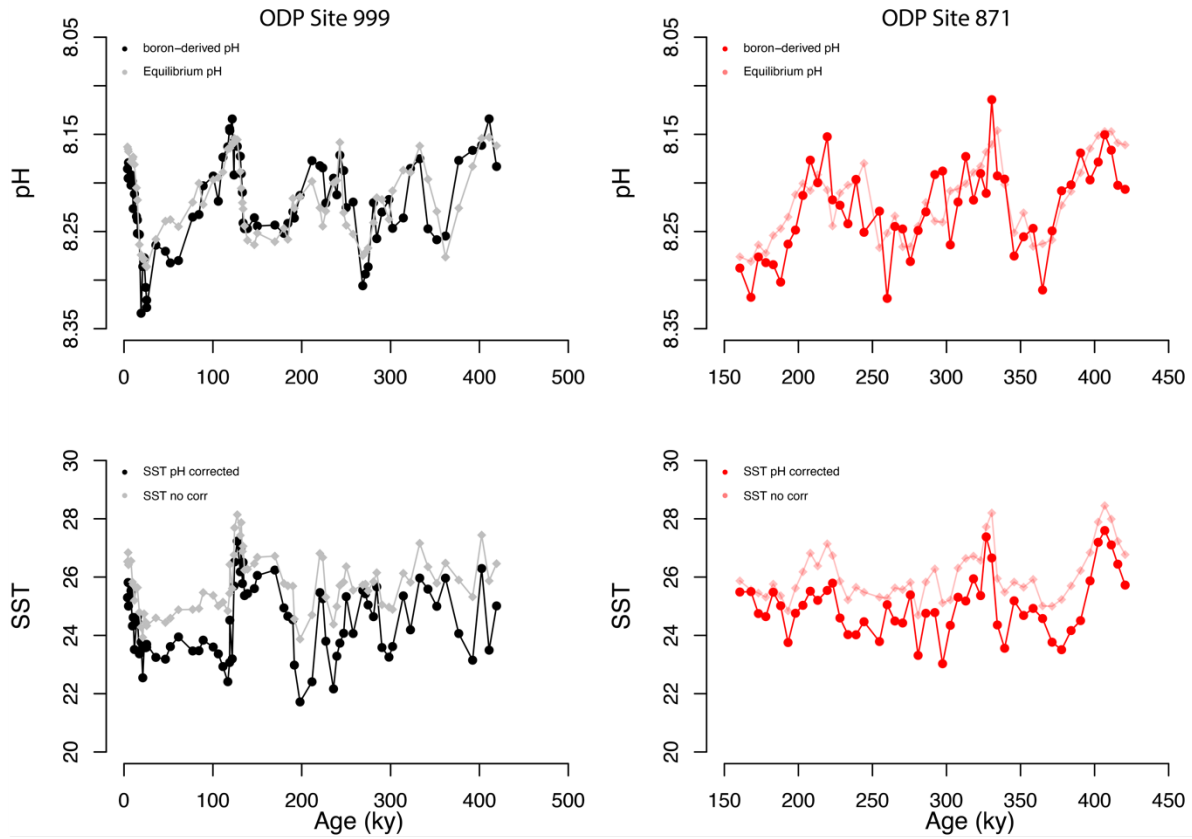

Figure S2. Top row:  $\delta^{11}\text{B}$ -derived pH (black and dark red) and equilibrium pH (i.e. derived from ice core  $\text{CO}_2$ , grey and light red). Bottom row: Mg/Ca-derived sea surface temperature (SST) with no pH correction (grey and light red) and with pH correction (black and dark red).

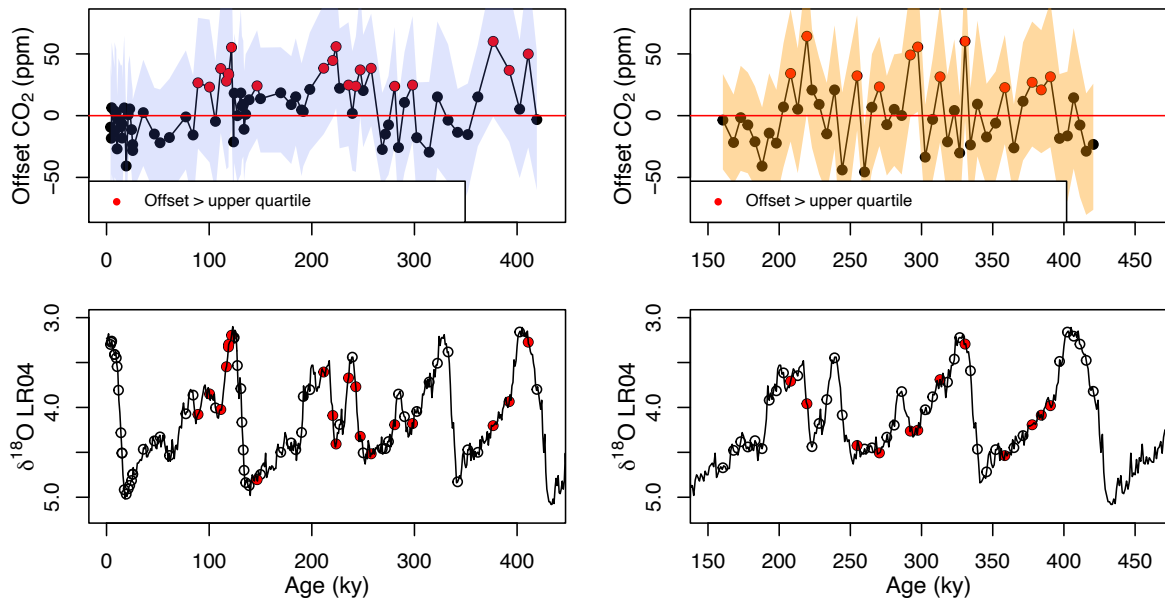

Figure S3. Upper panel:  $\text{CO}_2$  offset ( $\delta^{11}\text{B}$ -derived  $\text{CO}_2$  minus ice core  $\text{CO}_2$ ), red dots are the offset above the upper quartile (i.e. 25% of the data that lies above the upper quartile). Lower panel: LR04  $\delta^{18}\text{O}$  (black line), interpolated  $\delta^{18}\text{O}$  (open circles) from the  $\delta^{11}\text{B}$ -derived  $\text{CO}_2$  and red points are the interpolated values for which  $\text{CO}_2$  offset is high (above the upper quartile). This shows that the values of high  $\text{CO}_2$  offset (between boron-derived and ice core  $\text{CO}_2$ ) tend to fall within periods at the beginning of the glaciation. Left panels for ODP Site 999, and right panels for ODP Site 871.

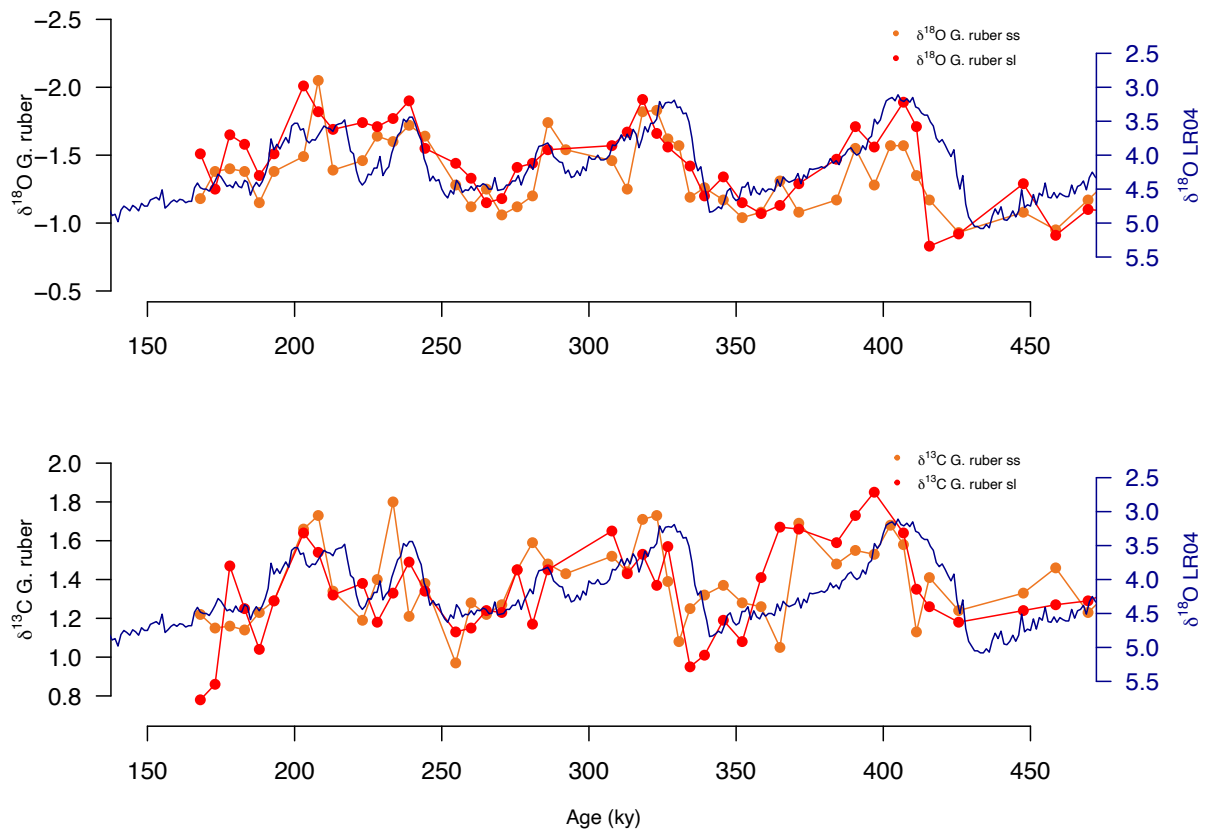

Figure S4. Time series of  $\delta^{13}\text{C}$  and  $\delta^{18}\text{O}$  for the two morphotypes of *G. ruber* at ODP Site 871 (sensu stricto, orange; and sensu lato, red). The benthic  $\delta^{18}\text{O}$  stack LR04 is plotted for reference (dark blue).

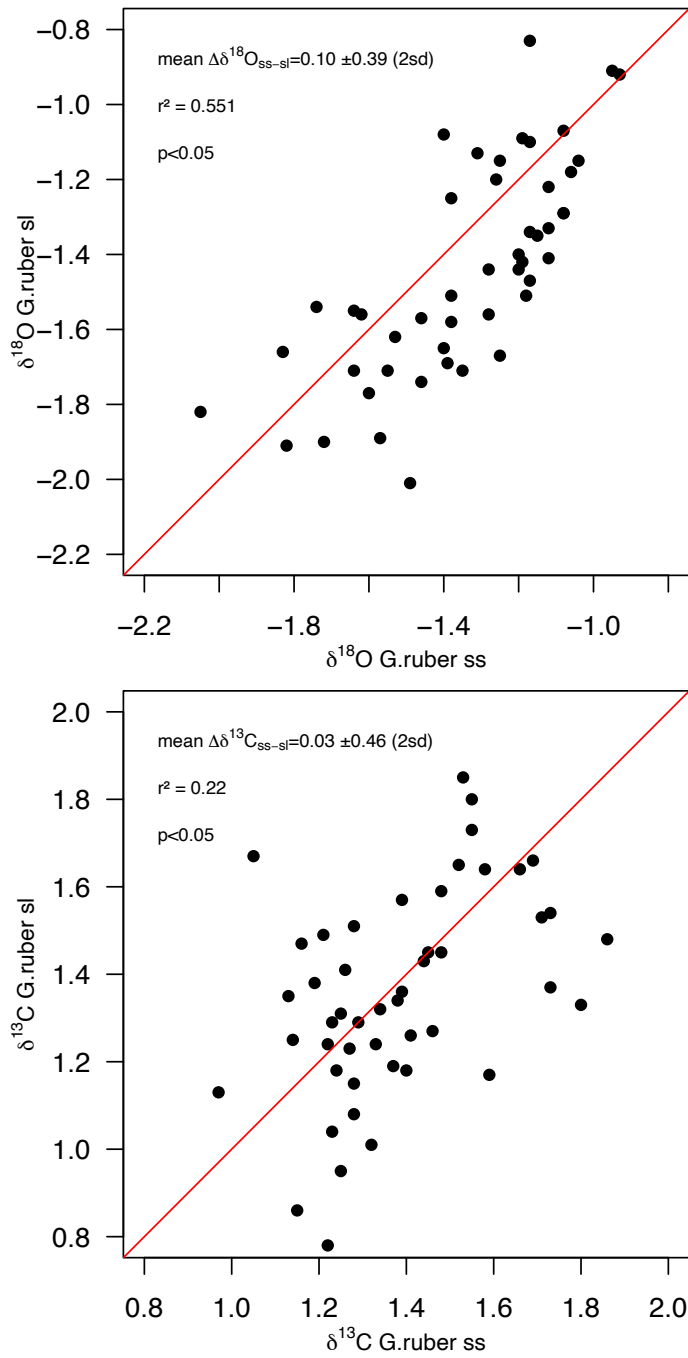

Figure S5. Cross plot of  $\delta^{18}\text{O}$  and  $\delta^{13}\text{C}$  of the two morphotypes of *G. ruber* (*sensu stricto* and *sensu lato*) and associated  $r^2$ . The red line is the 1:1 line. The mean offset and 2 standard deviation between  $\delta^{18}\text{O}$  and  $\delta^{13}\text{C}$  of both morphotypes is shown (‰).

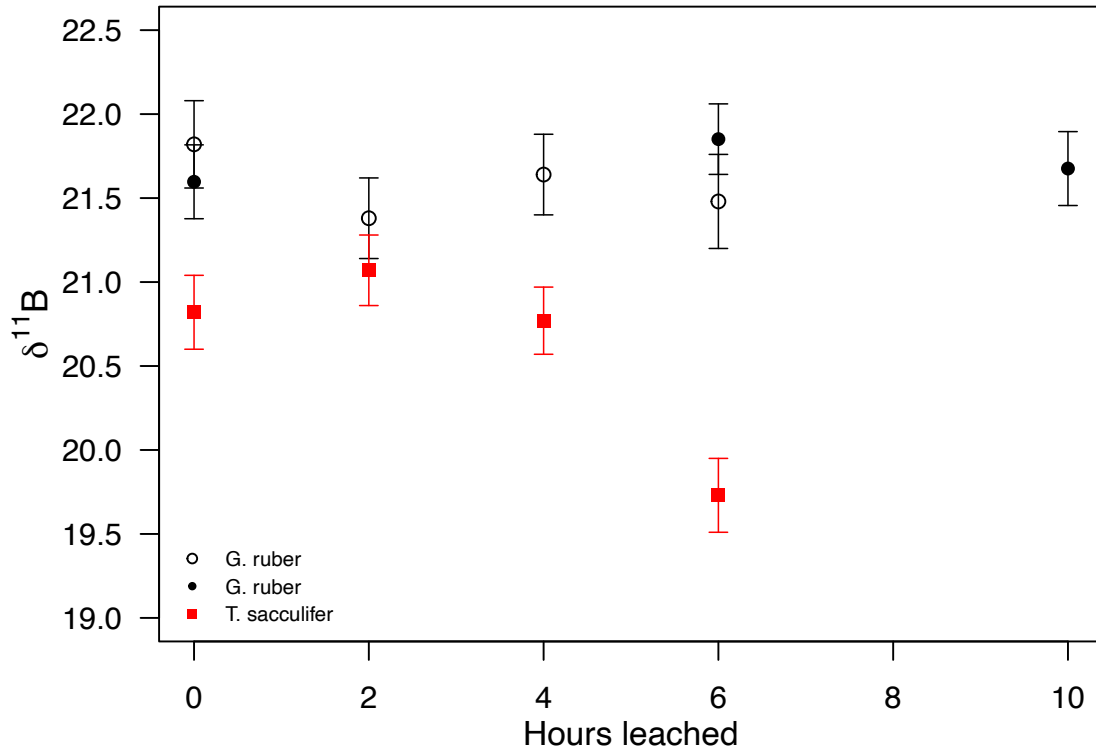

Fig S6. Dissolution tests conducted on *T. sacculifer* (size 500-600  $\mu\text{m}$ ) and *G. ruber ss* (size 300-355  $\mu\text{m}$ ). Whole foraminifera tests were put in contact with 0.0001M  $\text{HNO}_3$  (pH 4) for different durations. *T. sacculifer* (red squares) shows a fractionation of  $\delta^{11}\text{B}$  after 6 hours leached in pH 4 whilst *G. ruber ss* shows no response after 6 and 10 hours. Dissolution tests on *G. ruber* was conducted twice on different sample set and for different maximum duration (6 hours, black open circles; and 10 hours, black filled circles).

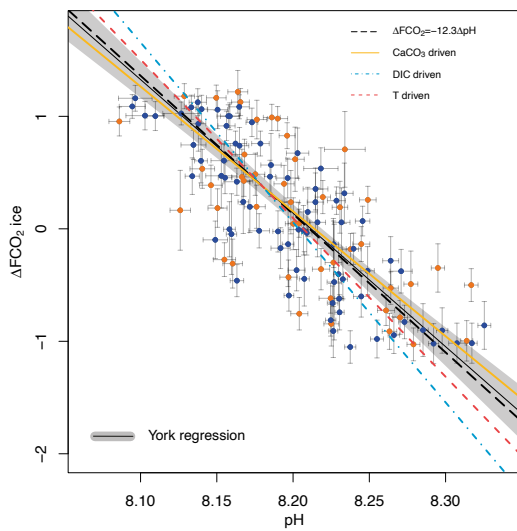

pH uncertainty from  $\delta^{11}\text{B}$  borate only ( $2\sigma$ ):  
 $\Delta F/\Delta\text{pH} = -12.4 \pm 0.3 \text{ W/m}^2$   
 $\text{mswd} = 6.07$

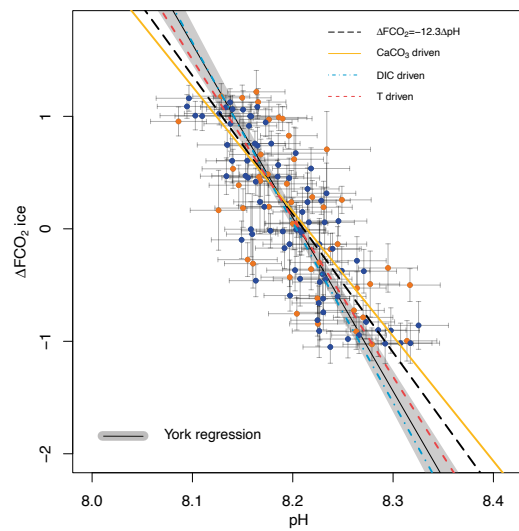

pH uncertainty from Monte Carlo simulation ( $2\sigma$ ):  
 $\Delta F/\Delta\text{pH} = -15.4 \pm 0.8 \text{ W/m}^2$   
 $\text{mswd} = 1.09$

Figure S7. Effect of pH uncertainty on the York regression between  $\Delta\text{FCO}_2$  and pH. The goodness of fit MSWD is improved when using the fully propagated pH uncertainty (from Monte Carlo simulation).

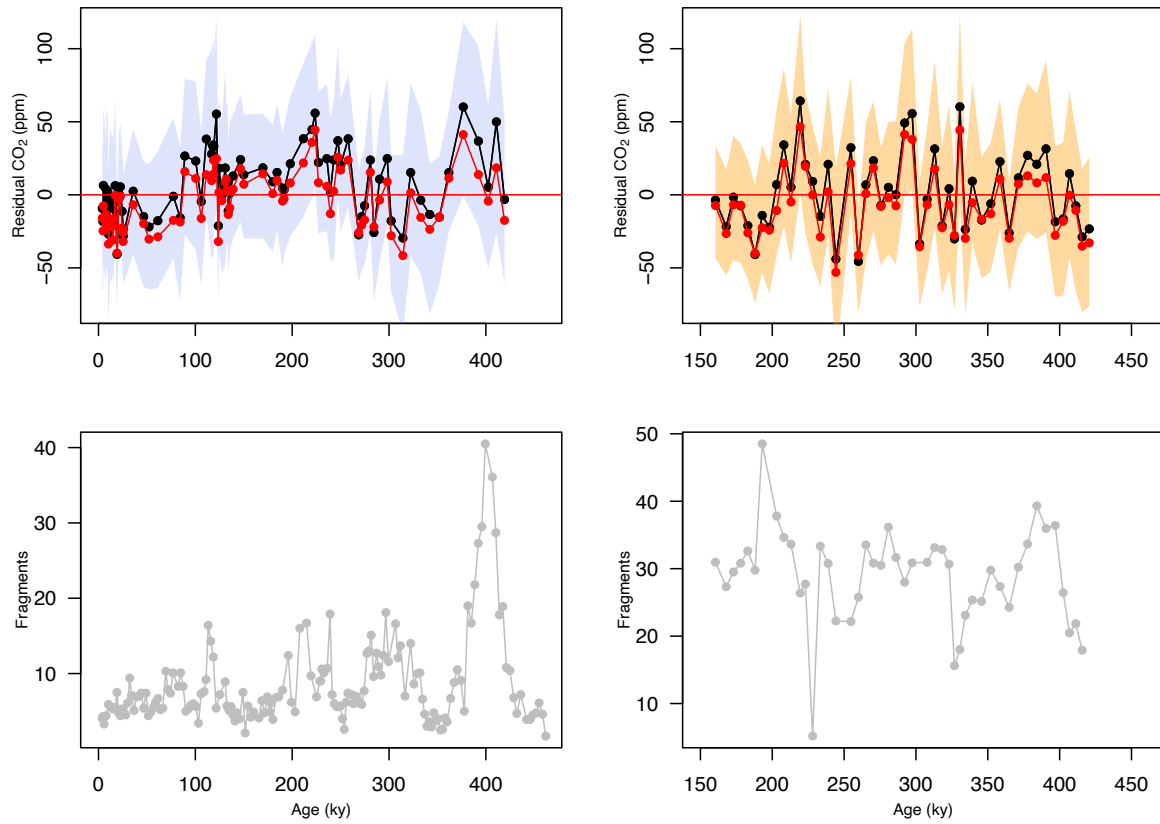

Figure S8. Comparison of CO<sub>2</sub> offset (or residual,  $\delta^{11}\text{B}$ -derived CO<sub>2</sub> minus ice core CO<sub>2</sub>) for CO<sub>2</sub> calculated with original SST (black line) or with SST including a pH correction (red line). Bottom row is the fragmentation index for each core location (left ODP Site 999, right ODP Site 871).

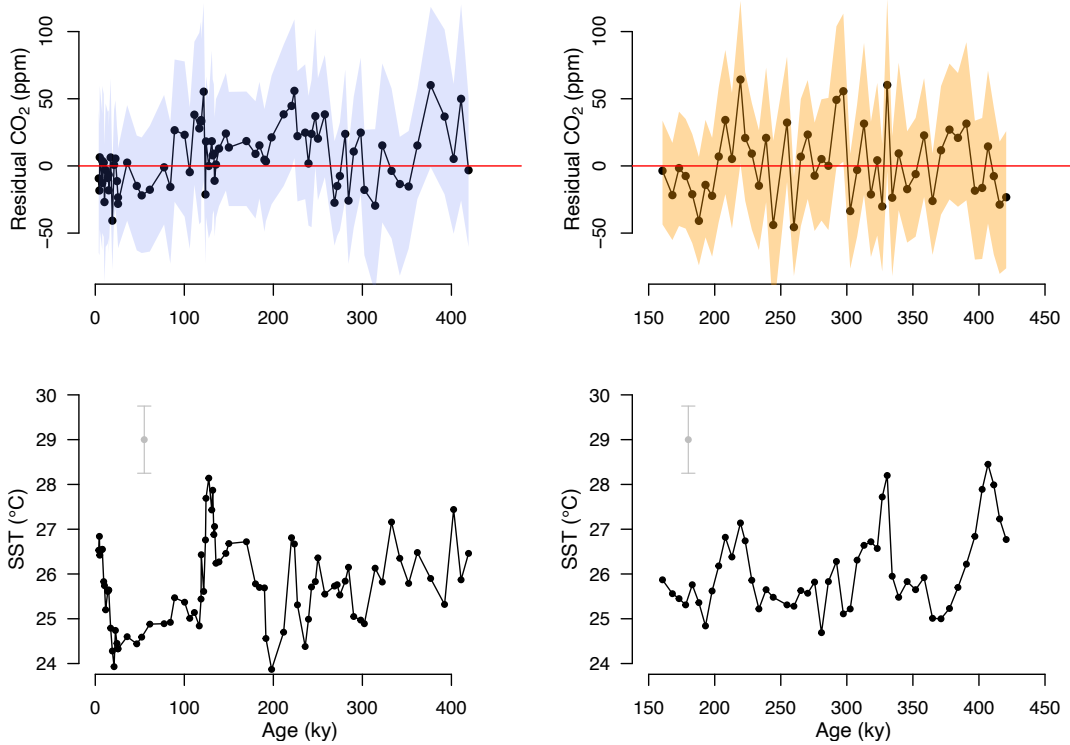

Figure S9. CO<sub>2</sub> offset ( $\delta^{11}\text{B}$ -derived CO<sub>2</sub> minus ice core CO<sub>2</sub>) compared to Mg/Ca-derived sea surface temperature of *G. ruber* (left ODP Site 999, right ODP Site 871). Periods of high CO<sub>2</sub> offset do not coincide with anomalous cold temperature recorded by *G. ruber*, ruling out upwelling and CO<sub>2</sub> disequilibrium as a cause of CO<sub>2</sub> offsets.

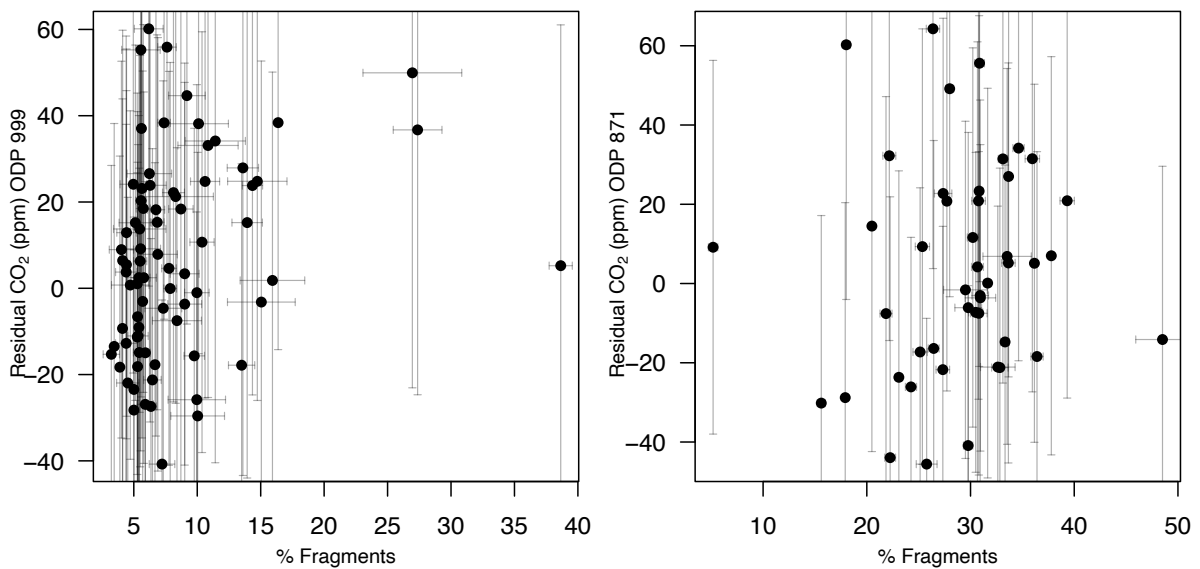

Figure S10. Crossplot of CO<sub>2</sub> residual (difference between CO<sub>2</sub> from ice cores and calculated from  $\delta^{11}\text{B}$ ) and fragment counts at site 999 (left) and 871 (right). Fragmentation index at site 999 (Schmidt et al. 2006) are interpolated from  $\delta^{11}\text{B}$ -derived CO<sub>2</sub>. Fragmentation index and  $\delta^{11}\text{B}$ -derived CO<sub>2</sub> are from the same sample at site 871. Ice core CO<sub>2</sub> data are interpolated from  $\delta^{11}\text{B}$ -derived CO<sub>2</sub> at both sites.

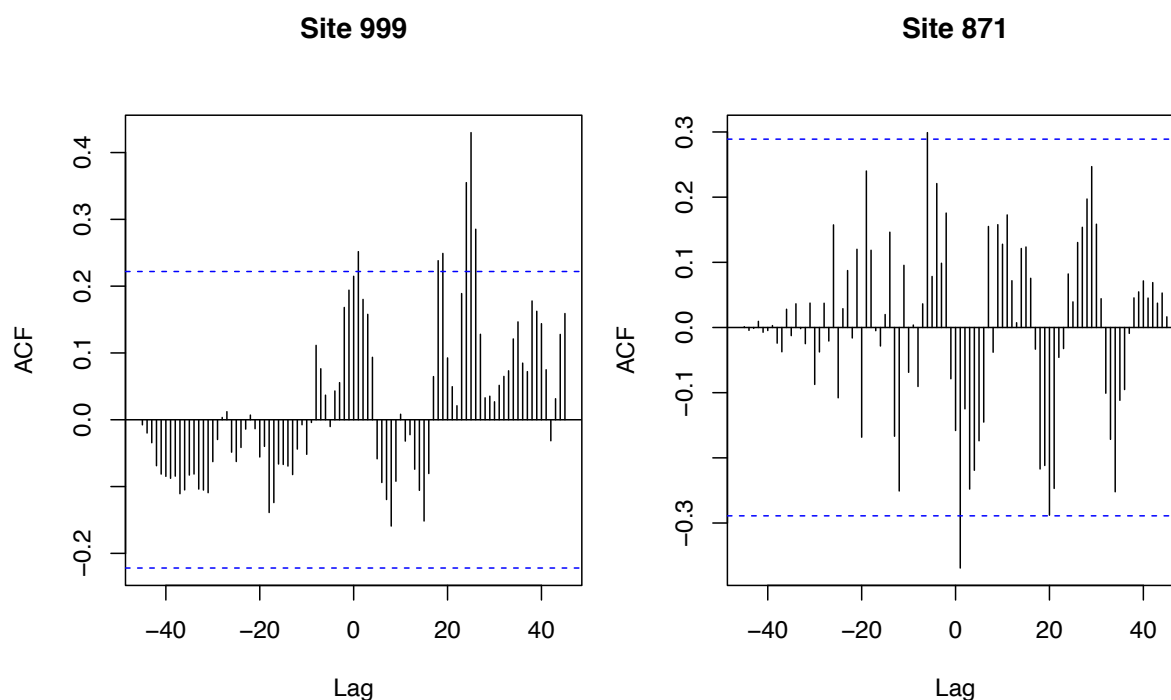

Figure S11. Cross-correlation function of CO<sub>2</sub> offset and fragmentation index for site 871 and 999. Negative (positive) lags mean that CO<sub>2</sub> offsets lead (lag) fragmentation index. The blue dotted lines are uncertainties, the values beyond which the autocorrelation (ACF) is significant. Whilst 6 values of ACF are outside uncertainty at site 999 and 2 values at site 871, most ACF values are within uncertainty and argue in favour of no correlation between CO<sub>2</sub> offset and fragmentation index.

#### Supplementary information S12. Relationship between pH, DIC and TA.

Dissolved inorganic carbon DIC and total alkalinity TA, are defined by the following, with [X] the concentration of compound X.

$$DIC = [CO_2] + [HCO_3^-] + [CO_3^{2-}] \text{ (eq 1a)}$$

$$TA = [HCO_3^-] + 2[CO_3^{2-}] + [B(OH)_4^-] + [OH^-] - [H^+] + \text{minor compounds} \text{ (eq 2a)}$$

At pH 8.1 in seawater CO<sub>2</sub> concentrations is small, such as equation (1a) can be approximated to:

$$DIC = [HCO_3^-] + [CO_3^{2-}] \text{ (eq 1b)}$$

TA can also be approximated by the carbonate alkalinity such as:

$$TA = [HCO_3^-] + 2[CO_3^{2-}] \text{ (eq 2b)}$$

By combining (eq1b) and (eq2b), we obtain:

$$TA - DIC = [CO_3^{2-}] \text{ (eq3)}$$

$$2DIC - TA = [HCO_3^-] \text{ (eq4)}$$



Now considering the equilibrium constants of carbonate compounds in seawater from the following chemical reactions ( $K_1$  and  $K_2$  are the equilibrium constants):

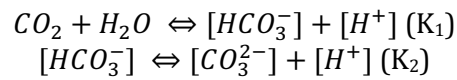

$$\text{With } K_1 = \frac{[HCO_3^-][H^+]}{[CO_2]} \quad (\text{eq5})$$

$$K_2 = \frac{[CO_3^{2-}][H^+]}{[HCO_3^-]} \quad (\text{eq6})$$

It follows from (eq6), (eq3) and (eq4):

$$[H^+] = \frac{K_2(2DIC - TA)}{TA - DIC} \quad (\text{eq7})$$

As pH is related to  $[H^+]$ , any change in alkalinity for a given pH, is compensated by a change in DIC.

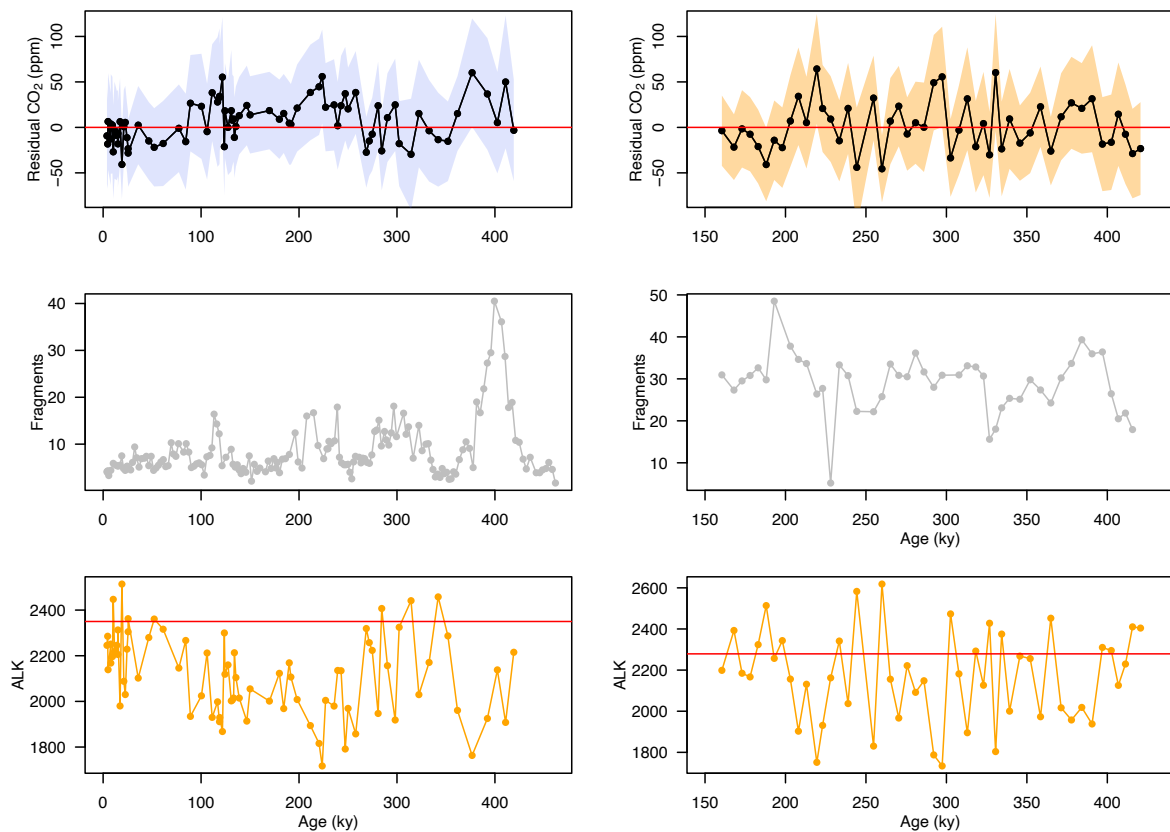

Figure S13. Left column: ODP Site 999, right column: ODP Site 871. Alkalinity (ALK,  $\mu\text{mol/kg}$ ) change calculated from  $\delta^{11}\text{B}$ -derived pH and ice core  $\text{CO}_2$ . The red line is the modern alkalinity values at each core site. If  $\text{CO}_2$  offsets were only produced by alkalinity change, it would require an alkalinity change of up to 500  $\mu\text{mol/kg}$ , a value beyond any estimated changes over the late Pleistocene (Hönisch et al., 2009, Cartapanis et al., 2018).

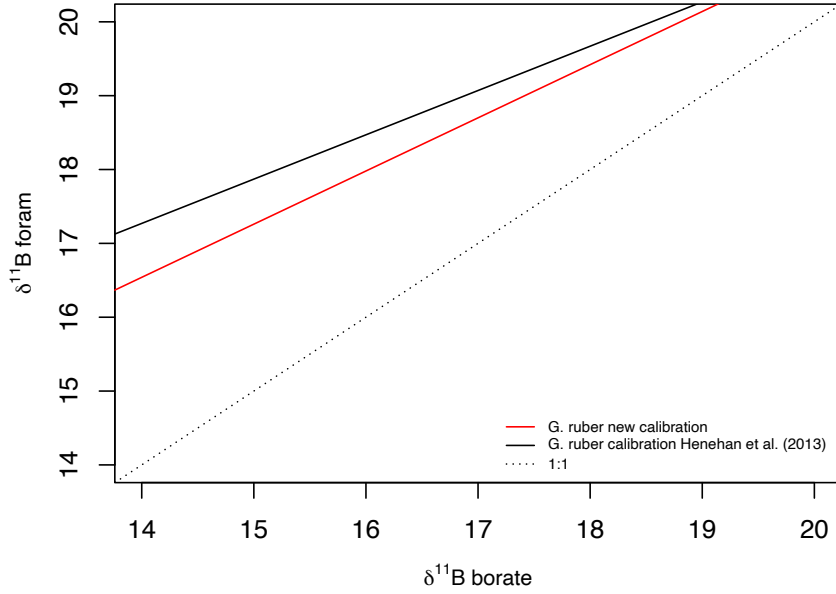

Figure S14. Calibration  $\delta^{11}\text{B}_{\text{foram-borate}}$  of Henehan et al. (2013) (black line) and optimised calibration of this study (red line), showing a steeper slope for the new optimised calibration.

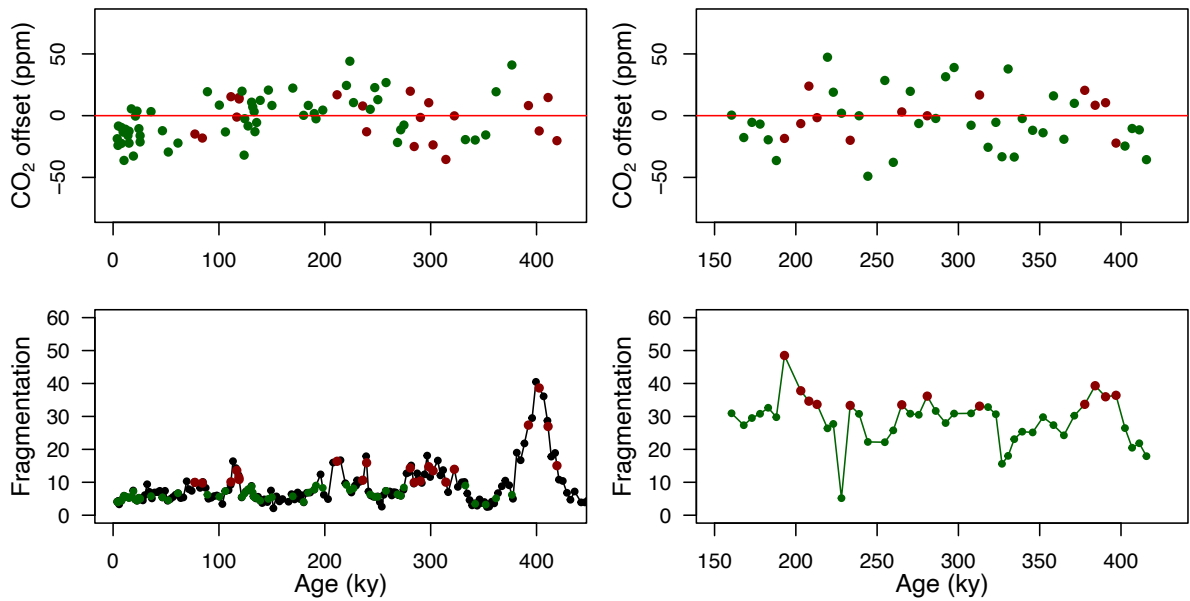

Figure S15. Left column: ODP Site 999, right column: ODP Site 871.  $\text{CO}_2$  offset (coloured dots, defined as  $\delta^{11}\text{B}$ -derived  $\text{CO}_2$  minus ice core  $\text{CO}_2$ ) with optimised borate-foram  $\delta^{11}\text{B}$  calibration. Lower panels: fragmentation index. Red dots in the lower panels are the fragments above the upper quartile (and corresponding  $\text{CO}_2$  in the upper panel, red dots). Green dots represent periods of low fragments below the upper quartile (and corresponding  $\text{CO}_2$  in the upper panel, green dots).
